# Supplementary material for: Energy Content and Nutrient Profiles of Frequently Consumed Meals in Singapore
Source: MDPI journal article supplement (doi:10.3390/foods10071659), 2021-07-19
Supplement: s1 [file s1]

## Supplementary Materials

Table S1: Description of selected commonly consumed Chinese local food

| Local Food               | Description                                                                                                                                                                                 |
|--------------------------|---------------------------------------------------------------------------------------------------------------------------------------------------------------------------------------------|
| Steamed Chicken Rice     | Steam chicken rice with chicken breast meat                                                                                                                                                 |
| Roasted Chicken Rice     | Chicken, roasted, with skin, served with rice and chilli sauce                                                                                                                              |
| Char Kuay Teow           | Mixture of flat rice noodles and egg noodles, stir-fried in sweet sauce with eggs, cockles, lap cheong (Chinese sausages), bean sprouts, and Chinese chives.                                |
| Yang Zhou Fried Rice     | Chinese-style fried rice characterized by its pale rice color adorned with colors coming from bits of meat, seafood like shrimp and crab meat, shiitake mushrooms, peas, carrots, and eggs. |
| Fried Carrot Cake        | Radish cake cubes, stir fried with eggs, preserved radish and then flavoured with seasonings.                                                                                               |
| Sin Chew Bee Hoon        | Rice Vermicelli, stir-fried with light soy sauce, vegetables and a modest sampling of seafood.                                                                                              |
| Minced Meat Mee Pok      | Egg noodles with black mushroom and minced pork, served with chilli sauce                                                                                                                   |
| Economical Mee Goreng    | Yellow noodles stir fried in sweet sauce with bean sprouts                                                                                                                                  |
| Lor Mai Kai              | Glutinous rice, filled with beans and minced meat                                                                                                                                           |
| Laska                    | Thick rice vermicelli served with thick coconut milk gravy with taupok and fishcake                                                                                                         |
| Ban Mian Dry             | Flat handmade noodles are tossed in a typical sweet-savoury brown sauce, and topped with braised mushrooms as well as minced pork.                                                          |
| Steamed Chicken Noodle   | Egg noodles with steamed chicken breast meat                                                                                                                                                |
| Fried Hokkien Mee        | Fried mixture of yellow noodle and thick rice vermicelli, with added prawn and cuttlefish                                                                                                   |
| Char Siew Wanton Noodles | Minced pork dumpling, boiled, with noodles, sliced char siew, chye sim and gravy                                                                                                            |
| Dumpling You Mian        | Handmade noodles cooked in soup typically, and added with ingredients such as minced pork, anchovies, mushrooms, spinach and dumplings.                                                     |

Table S2: Description of selected commonly consumed Malay local food

| Local Food                      | Description                                                                                                                                                                                                                                                                                                  |
|---------------------------------|--------------------------------------------------------------------------------------------------------------------------------------------------------------------------------------------------------------------------------------------------------------------------------------------------------------|
| Ayam Penyet                     | Smashed fried chicken thigh/drumstick, beancurd, and cucumber served with white rice and sambal chili.                                                                                                                                                                                                       |
| Nasi Kampung Goreng             | Cooked rice with eggs, mixed vegetables and tomato sauce, stir-fried, Malay style                                                                                                                                                                                                                            |
| Nasi Lemak                      | Rice cooked in coconut milk, wrapped inside a banana leaf with fried egg, anchovies, chilli sauce and fried chicken wing.                                                                                                                                                                                    |
| Ikan Penyet                     | Fried pomfret/cat fish, beancurd, and cucumber served with white rice and sambal chili.                                                                                                                                                                                                                      |
| Nasi Ambang                     | Fragrant rice dish that consists of - but is not limited to- steamed white rice, chicken curry/ chicken stewed in soy sauce, beef or chicken rendang, sambal goreng (lit. fried sambal; a mildly spicy stir-fried stew commonly made with firm tofu, tempeh, and long beans) urap, bergedel, and serunding.. |
| Goreng Pisang (Banana Fritters) | Snack made of banana or plantain, covered in batter or not, being deep fried in hot cooking oil                                                                                                                                                                                                              |
| Tahu Goreng                     | Deep fried tofu garnished with bean sprouts, cucumber and scallion. Topped with a thick sauce is prepared with shallots, garlic, chili peppers, shrimp paste, soy sauce and tamarind juice.                                                                                                                  |
| Mee Bandung                     | Yellow noodles with spicy,sweet and sour soup.                                                                                                                                                                                                                                                               |
| Mee Bakso                       | Indonesian beef meatballs served with noodles and soup                                                                                                                                                                                                                                                       |
| Lontong                         | Rice cakes in a coconut based soup such as sayur lodeh containing shrimp and vegetables like chopped cabbage, turnip and carrots.                                                                                                                                                                            |
| Mee Siam                        | Thin, white rice noodles, hard boiled egg and dried beancurd, served in tangy gravy                                                                                                                                                                                                                          |
| Mee Soto                        | Yellow noodles with shredded chicken in spicy soup                                                                                                                                                                                                                                                           |
| Kentang Ball with Rice Cube     | Deep fried mashed potato about the size of a cricket ball and rice cakes in a spicy chicken soup with bean sprouts                                                                                                                                                                                           |
| Soto Ayam                       | Soup containing shredded chicken, bean sprouts and rice cubes                                                                                                                                                                                                                                                |
| Mee Rebus                       | Thick, yellow egg noodles served in thick spicy gravy together with hard boiled egg                                                                                                                                                                                                                          |

Table S3: Description of selected commonly consumed Indian local food

| Local Food                       | Description                                                                                                                          |
|----------------------------------|--------------------------------------------------------------------------------------------------------------------------------------|
| Original Appam                   | Type of pancake, originating from the Indian subcontinent, made with fermented rice batter and coconut milk.                         |
| Egg Appam                        | Type of pancake, originating from the Indian subcontinent, made with fermented rice batter and coconut milk, with an addition of egg |
| Roti Prata                       | Thick, flat, round dough made with wheat flour, sugar, salt and water, fried with ghee                                               |
| Egg Prata with Chicken Curry     | South Indian flatbread that is crisp and flaky on the outside, but soft on the inside with egg as filling. Paired with chicken curry |
| Boneless Mutton Briyani          | Rice cooked with ghee and spices, served with spicy mutton                                                                           |
| Poori Set                        | Indian fried bread made from whole wheat flour and are served with side potato dish.                                                 |
| Marsala Thosai                   | Wafer filled with potato, long bean, carrot, pea, green chilli and Indian spice                                                      |
| Naan                             | Indian leavened bread made of flour, plain yoghurt, eggs and ghee/butter, pan fried                                                  |
| Chapatti Set with Potato         | Flat round pancake made of whole wheat flour or atta flour, ghee and water, pan-fried served with potato as side dish                |
| Putu Mayam                       | Thin rice noodles with grated coconut and red sugar                                                                                  |
| Chapatti Set with Potato Marsala | Flat round pancake made of whole wheat flour or atta flour, ghee and water, pan-fried served with curry potato as side dish          |
| Idli Set                         | Small, fluffy, spherical bread with tapered edges, made with ground rice and urad dahl and served with curry.                        |
| Egg Thosai                       | Round, pancake-like bread, made with fermented rice and gram batter filled with egg.                                                 |
| Vegetable Briyani                | Rice cooked with fried carrot, french bean, pea, corn, onion, tomato, cinnamon, cardamon, star anise                                 |
| Veg Set Meal (Briyani Rice)      | Cooked rice with ghee or oil and yellow food colouring and paired with vegetables.                                                   |

Table S4: Spike Recovery of Chinese Ethnic Local Food (Fried Carrot Cake)

|    | Unit | Spiked | Sample | Found | Recovery (%) |
|----|------|--------|--------|-------|--------------|
| Na | mg/L | 50     | 13.34  | 63.04 | 99.39        |
| Mg | mg/L | 5      | 0.31   | 5.24  | 98.55        |
| K  | mg/L | 50     | 2.62   | 49.88 | 94.53        |
| Ca | mg/L | 50     | 1.00   | 48.65 | 95.30        |
| Mn | mg/L | 0.05   | 0.00   | 0.05  | 105.90       |
| Fe | mg/L | 5      | 0.05   | 5.09  | 100.68       |

Table S5: Spike Recovery of Malay Ethnic Local Food (Ayam Penyet)

|    | Unit | Spiked | Sample | Found | Recovery (%) |
|----|------|--------|--------|-------|--------------|
| Na | mg/L | 50     | 10.33  | 58.81 | 96.95        |
| Mg | mg/L | 5      | 0.80   | 5.77  | 99.33        |
| K  | mg/L | 50     | 5.44   | 51.89 | 92.90        |
| Ca | mg/L | 50     | 1.99   | 49.06 | 94.13        |
| Mn | mg/L | 0.05   | 0.01   | 0.07  | 106.08       |
| Fe | mg/L | 5      | 0.03   | 5.14  | 102.16       |

Table S6: Spike Recovery of Indian Ethnic Local Food (Mutton Briyani)

|    | Unit | Spiked | Sample | Found | Recovery (%) |
|----|------|--------|--------|-------|--------------|
| Na | mg/L | 50     | 19.70  | 67.15 | 94.91        |
| Mg | mg/L | 5      | 0.80   | 5.68  | 97.62        |
| K  | mg/L | 50     | 7.29   | 53.50 | 92.41        |
| Ca | mg/L | 50     | 0.67   | 48.27 | 95.20        |
| Mn | mg/L | 0.05   | 0.01   | 0.06  | 92.42        |
| Fe | mg/L | 5      | 0.05   | 5.11  | 101.28       |

**Figure S1:** Mineral contents of the commonly consumed Chinese cuisines (calculated based on portion size). a) Sodium; b) Magnesium; c) Potassium; c) Calcium; d) Manganese; e) Iron.

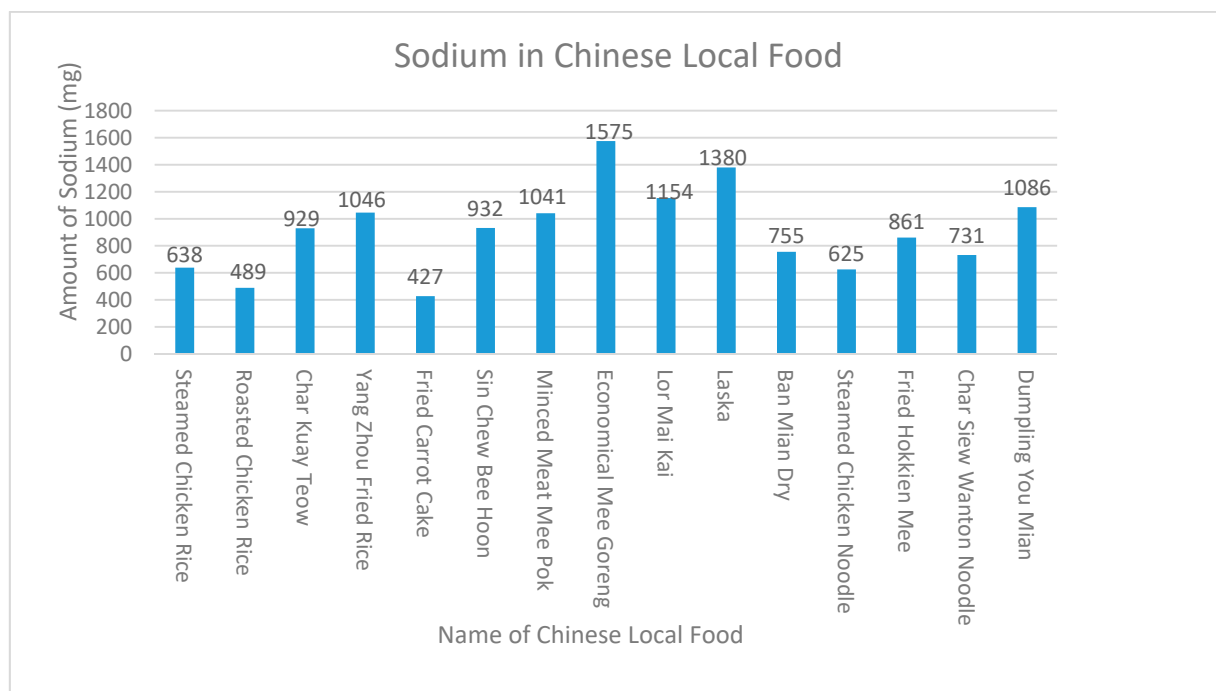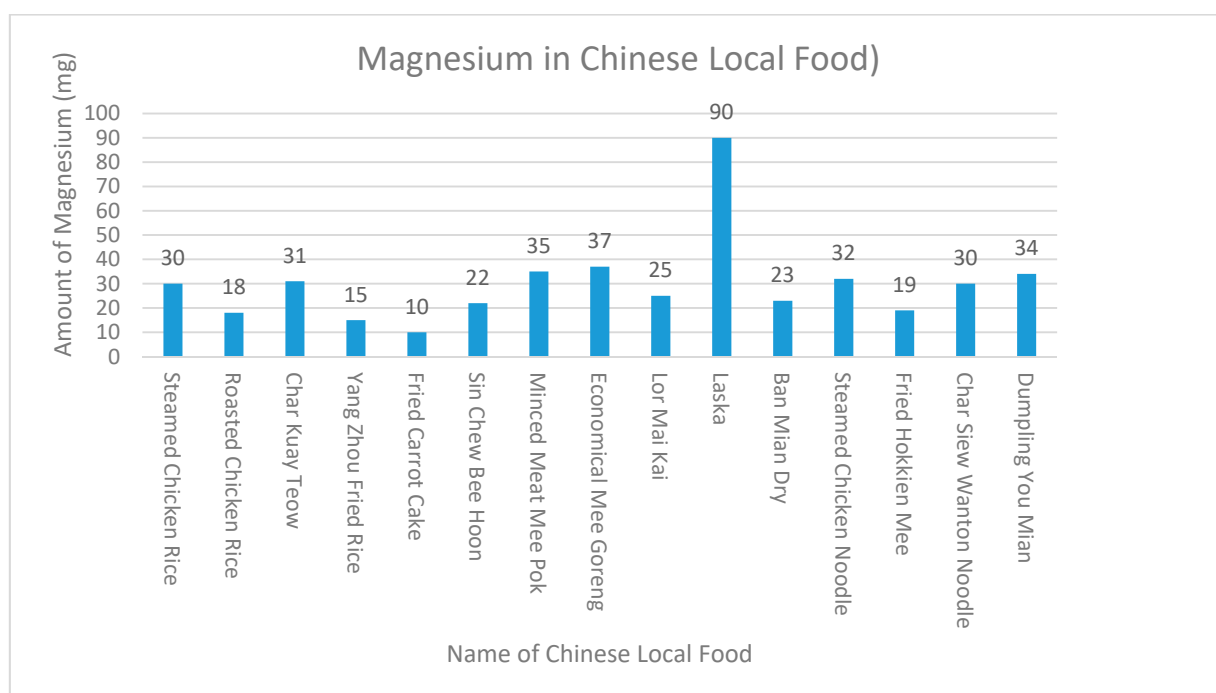

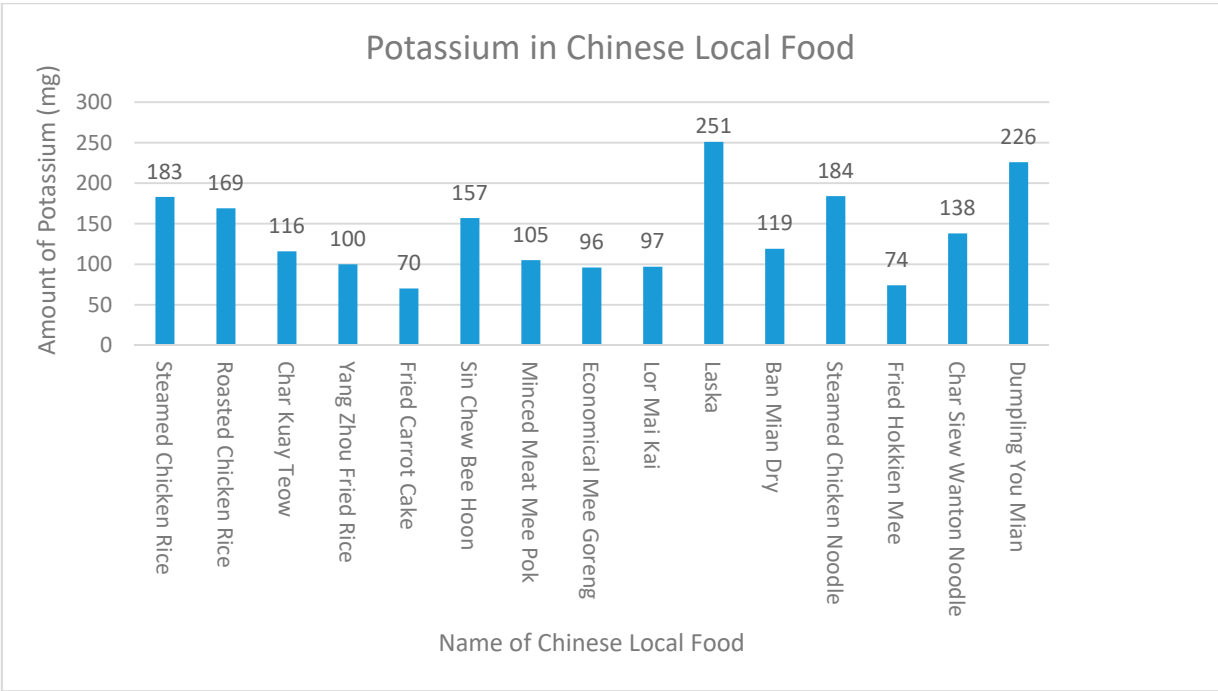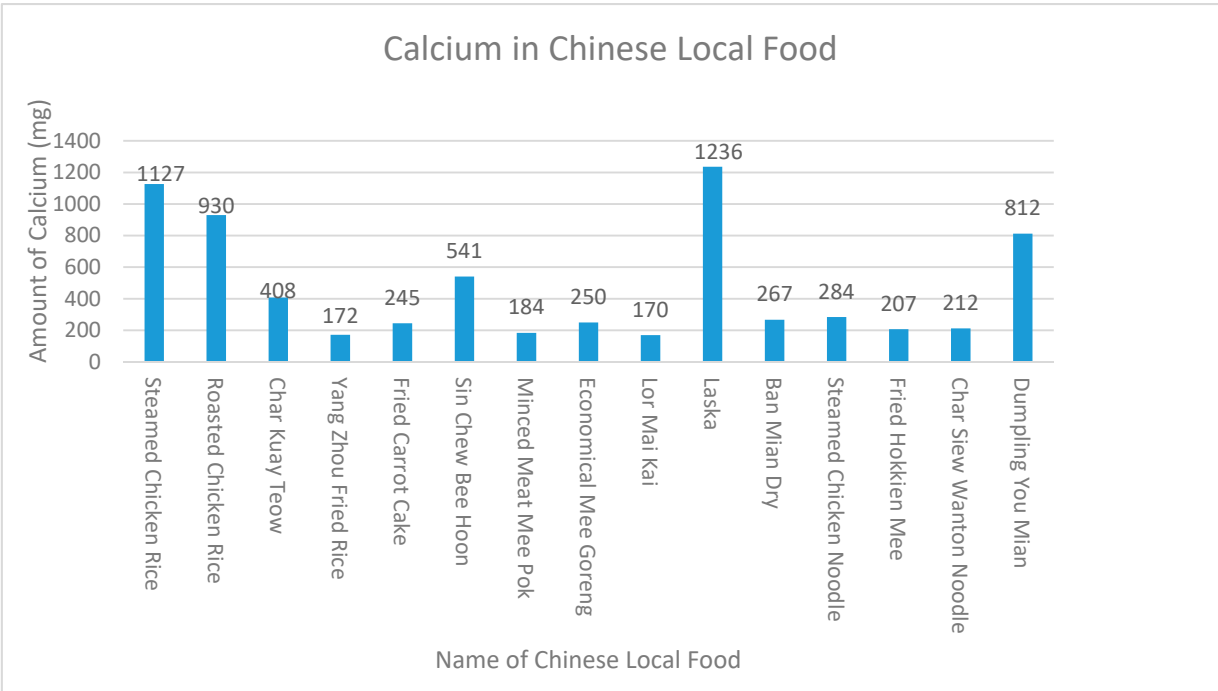

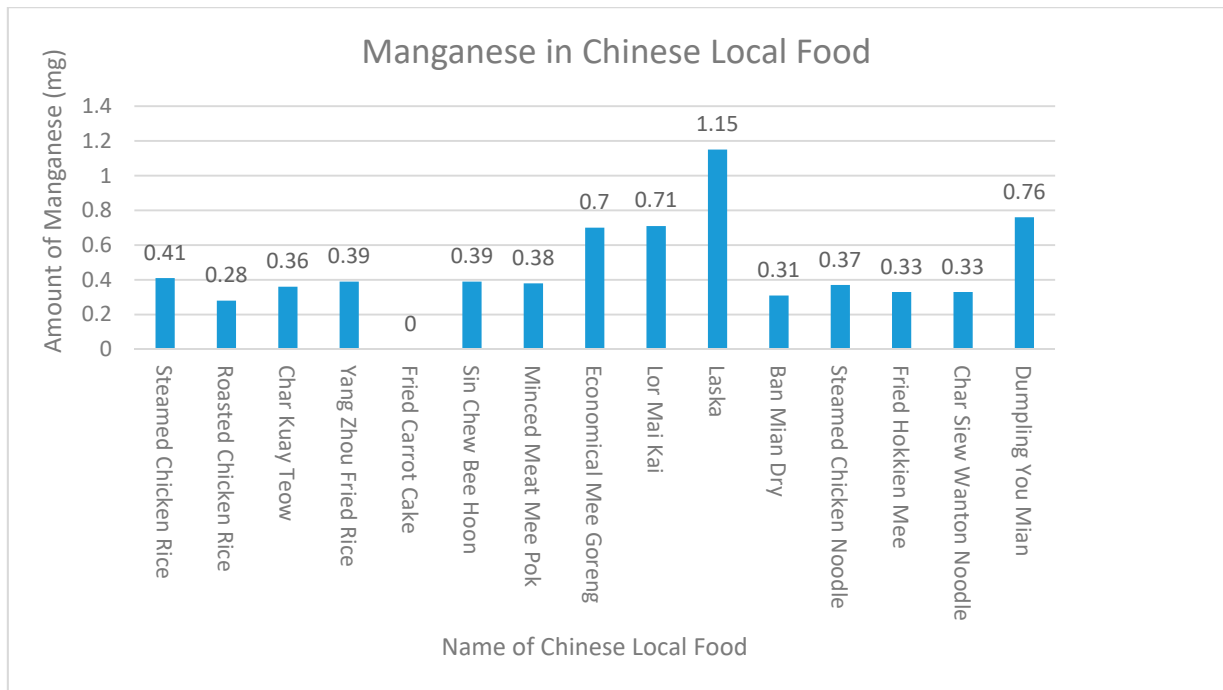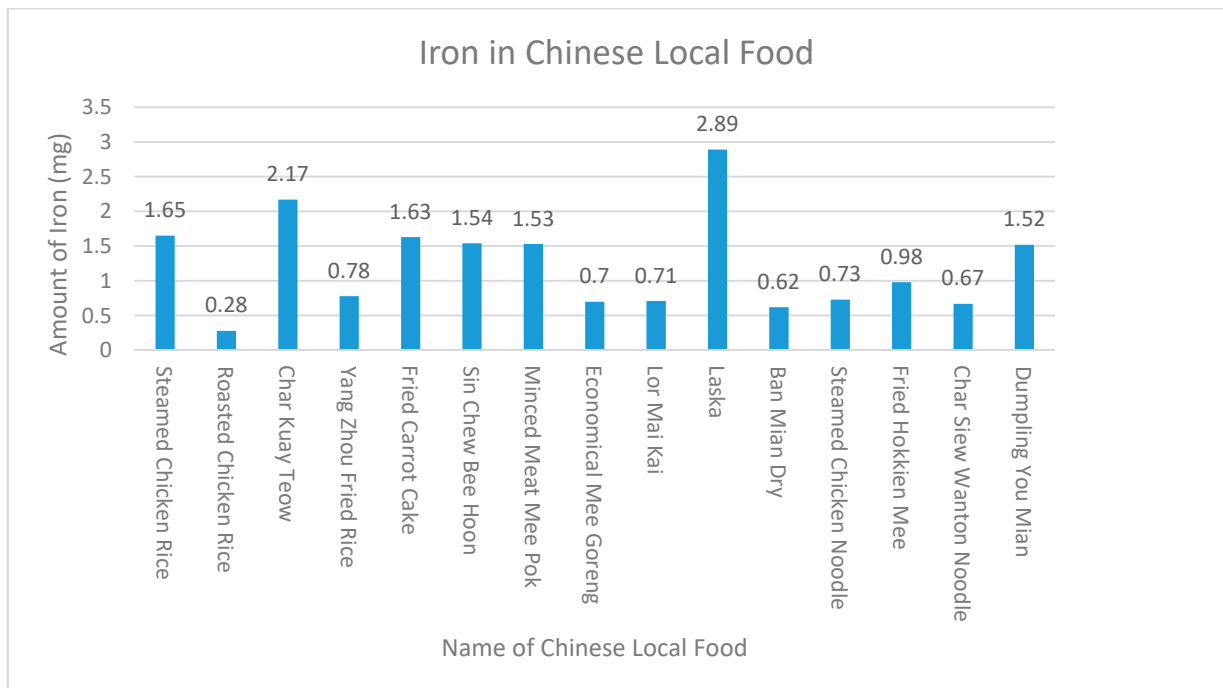

To calculate the mineral content of the food in mg/100g, you can use the value and divide by (portion size/100)

**Figure S2:** Mineral contents of the commonly consumed Malay cuisines (calculated based on portion size). a) Sodium; b) Magnesium; c) Potassium; c) Calcium; d) Manganese; e) Iron.

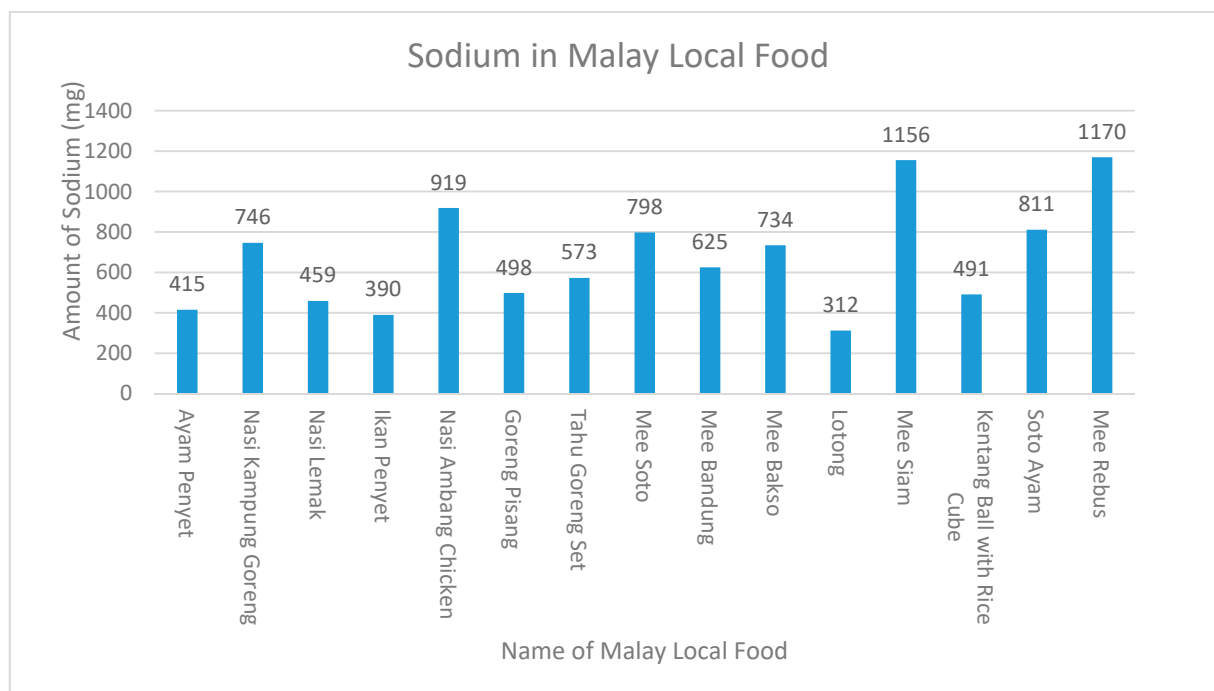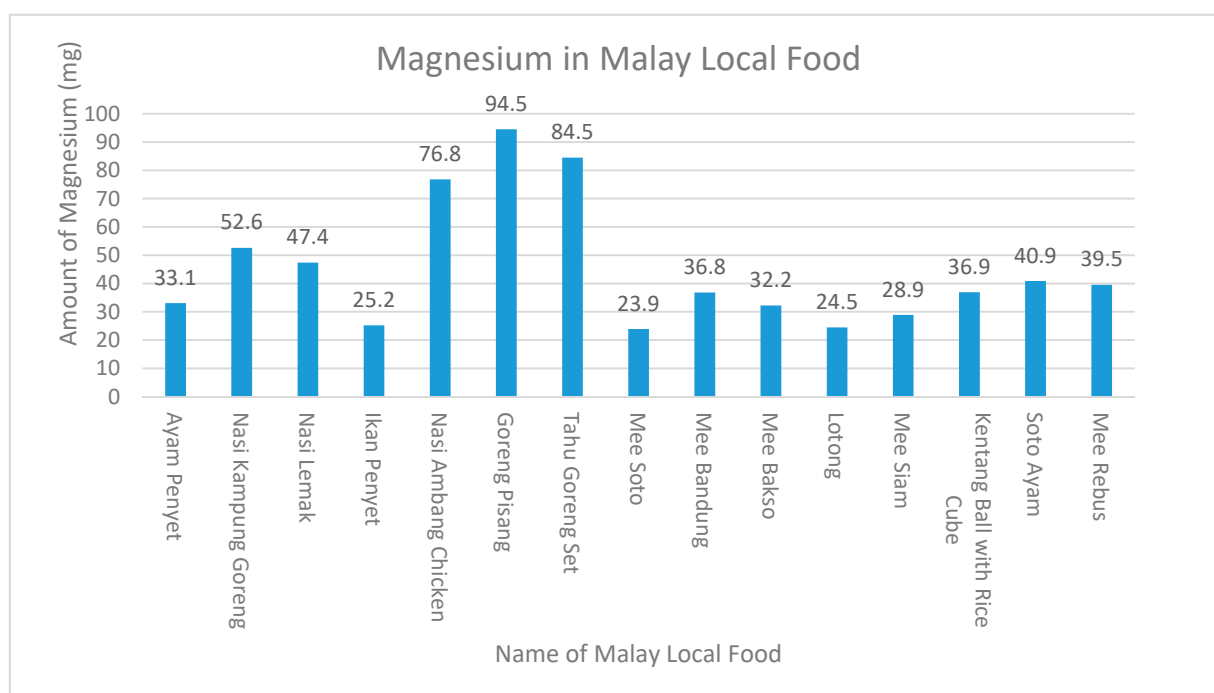



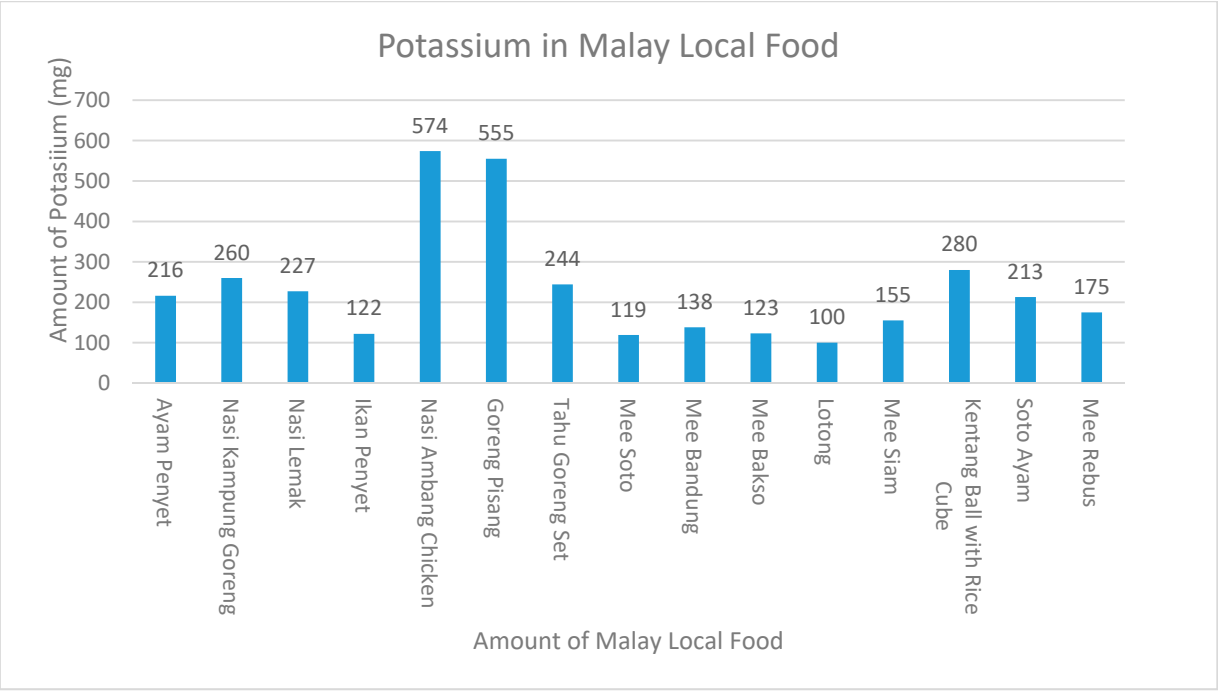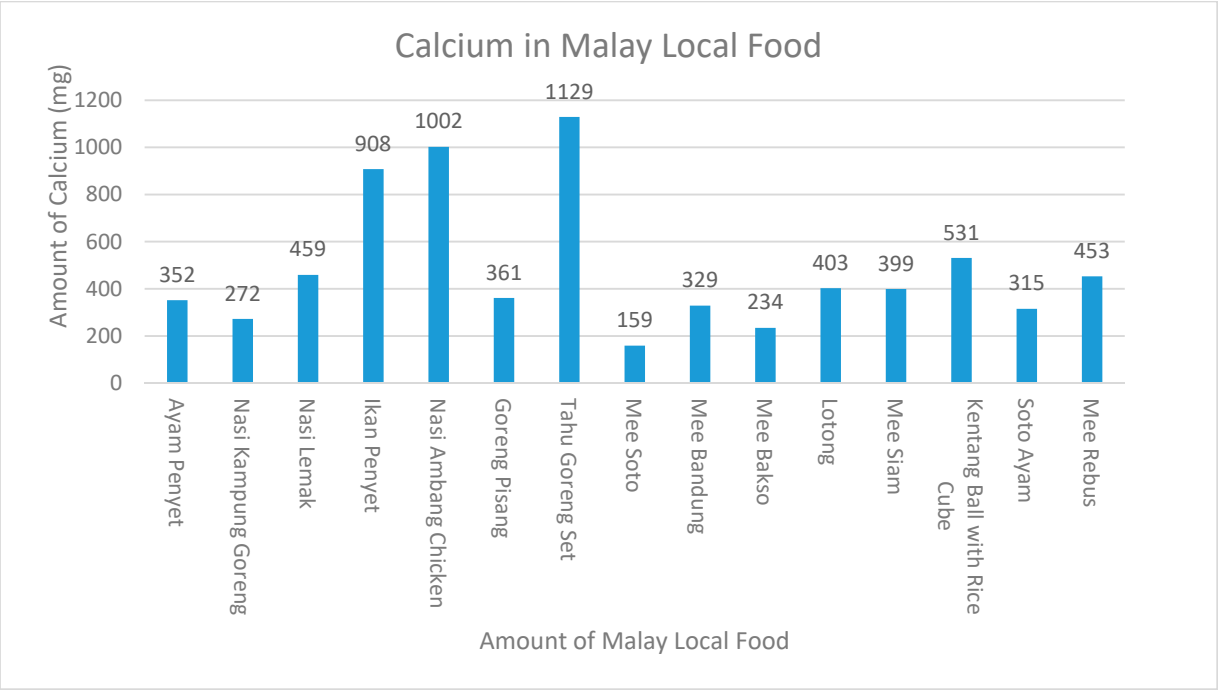

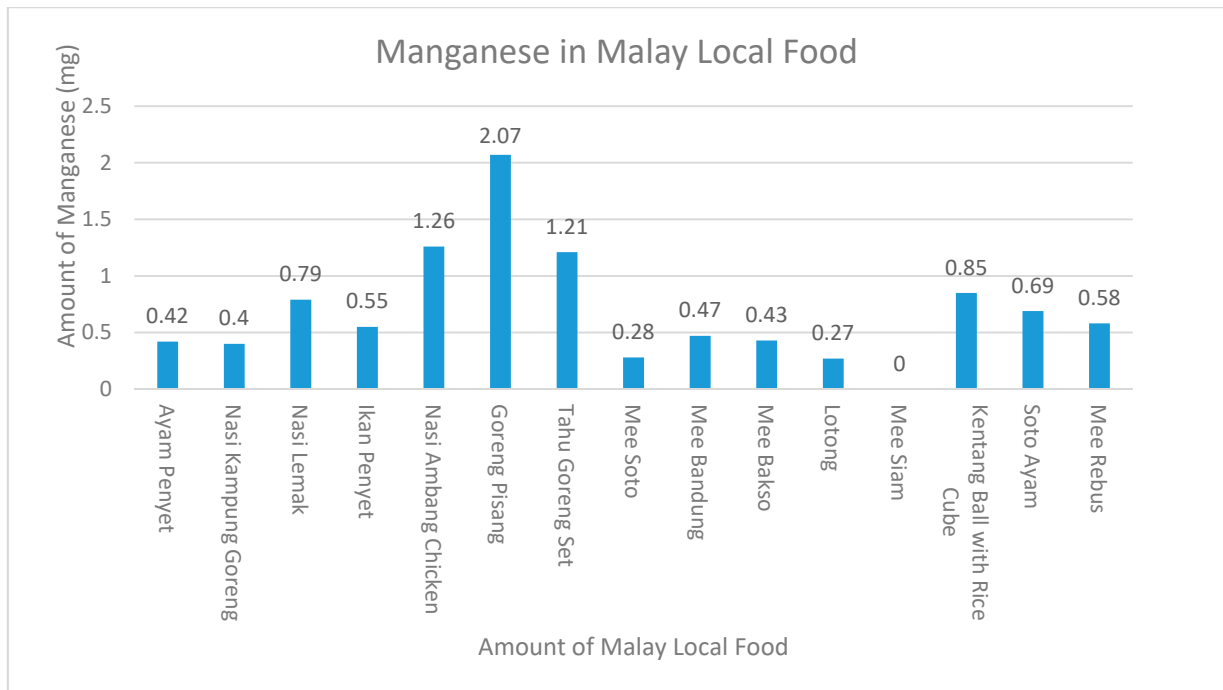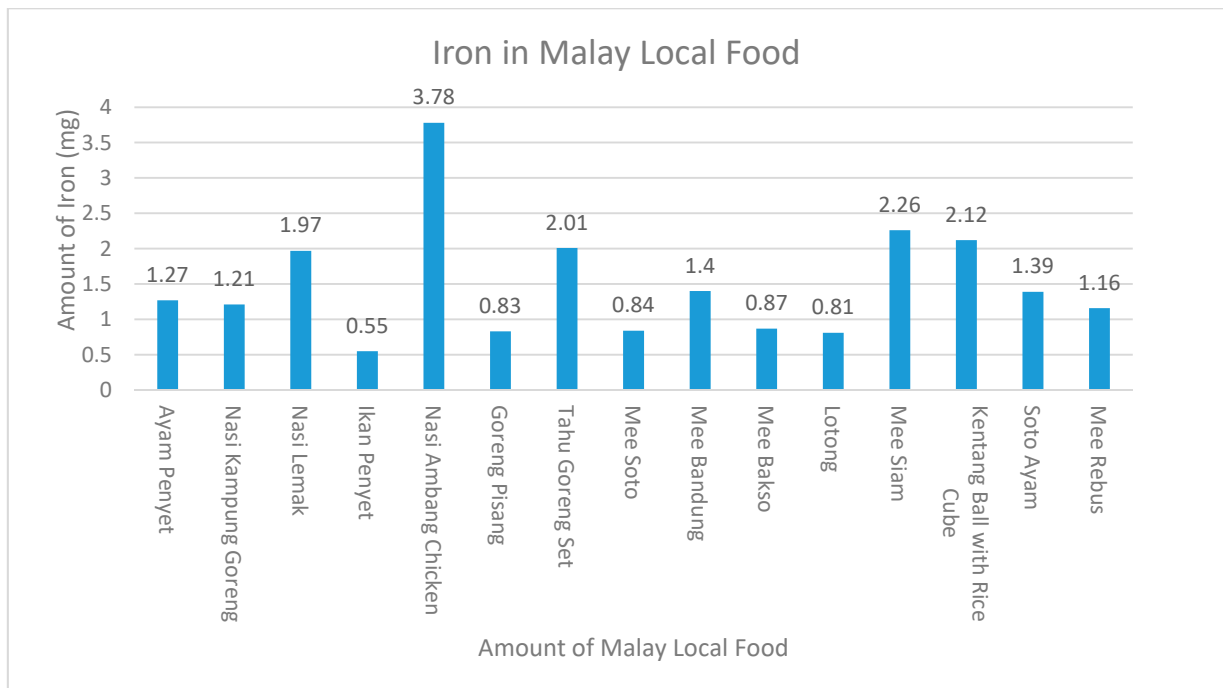

To calculate the mineral content of the food in mg/100g, you can use the value and divide by (portion size/100)

**Figure S3:** Mineral contents of the commonly consumed Indian cuisines (calculated based on portion size). a) Sodium; b) Magnesium; c) Potassium; c) Calcium; d) Manganese; e) Iron

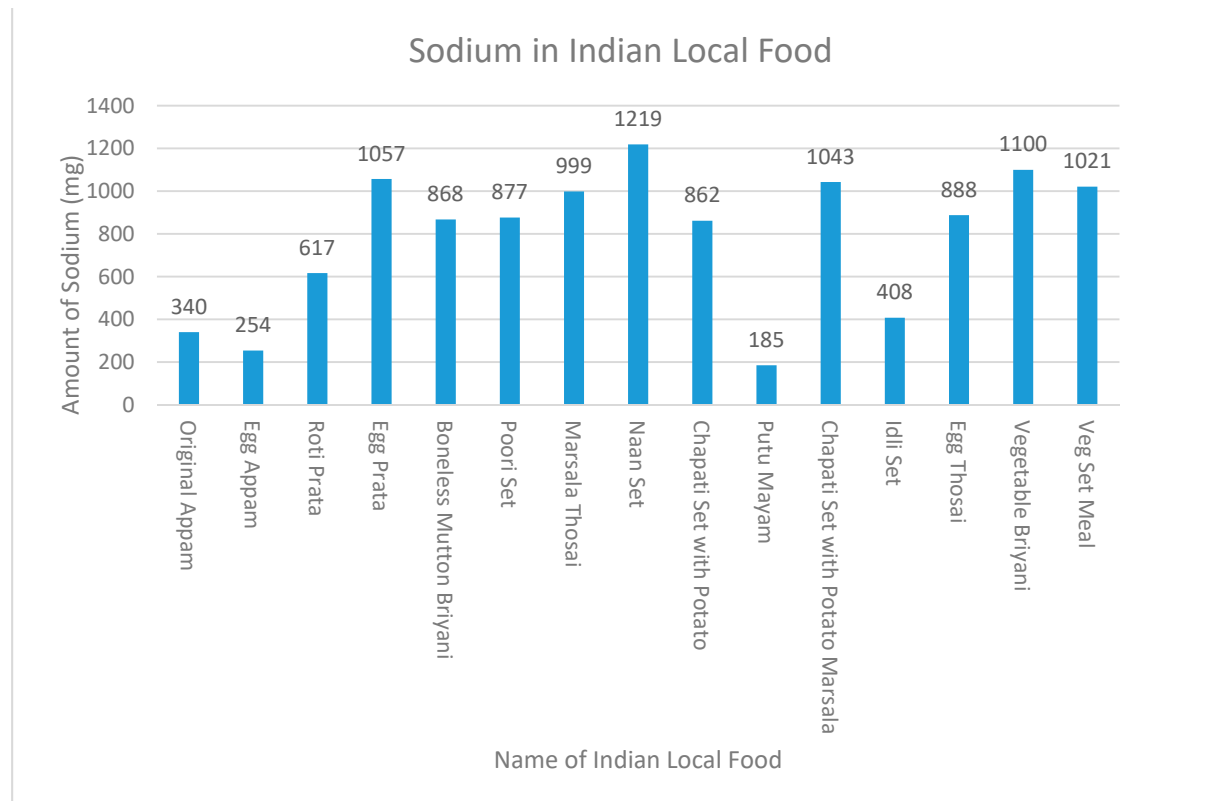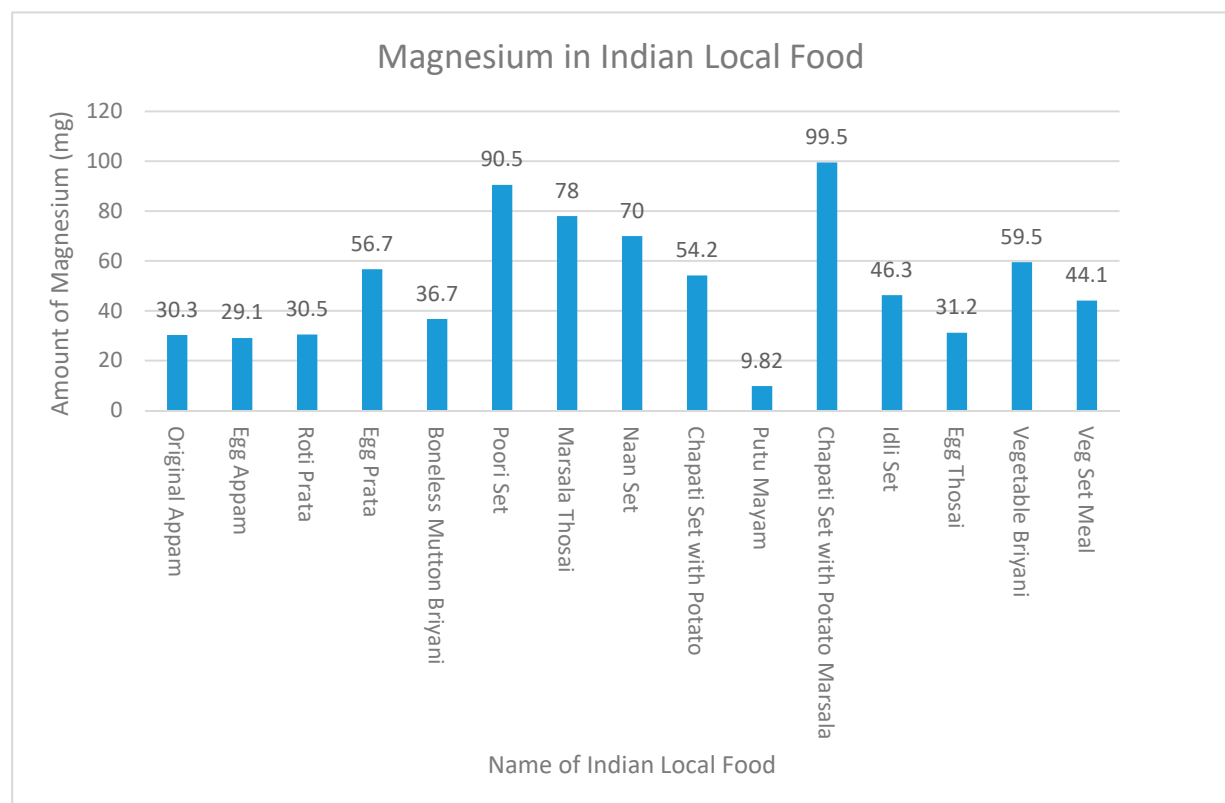

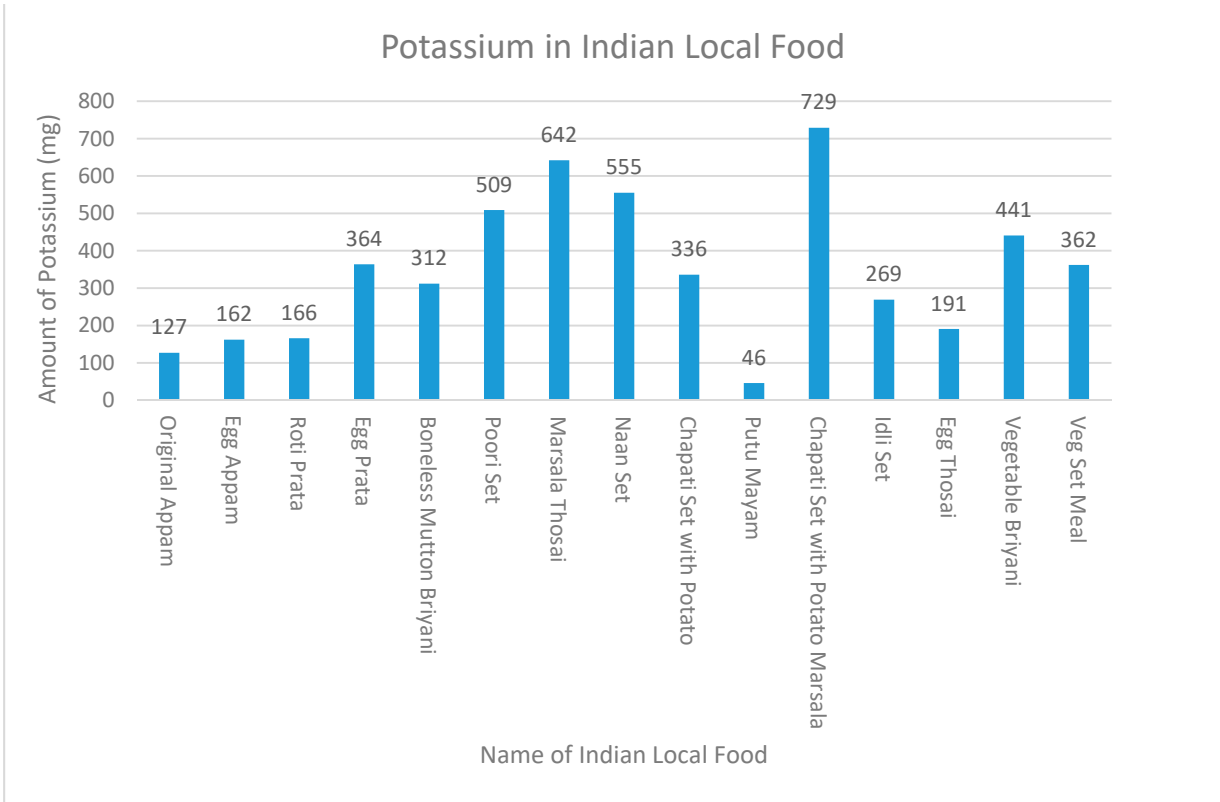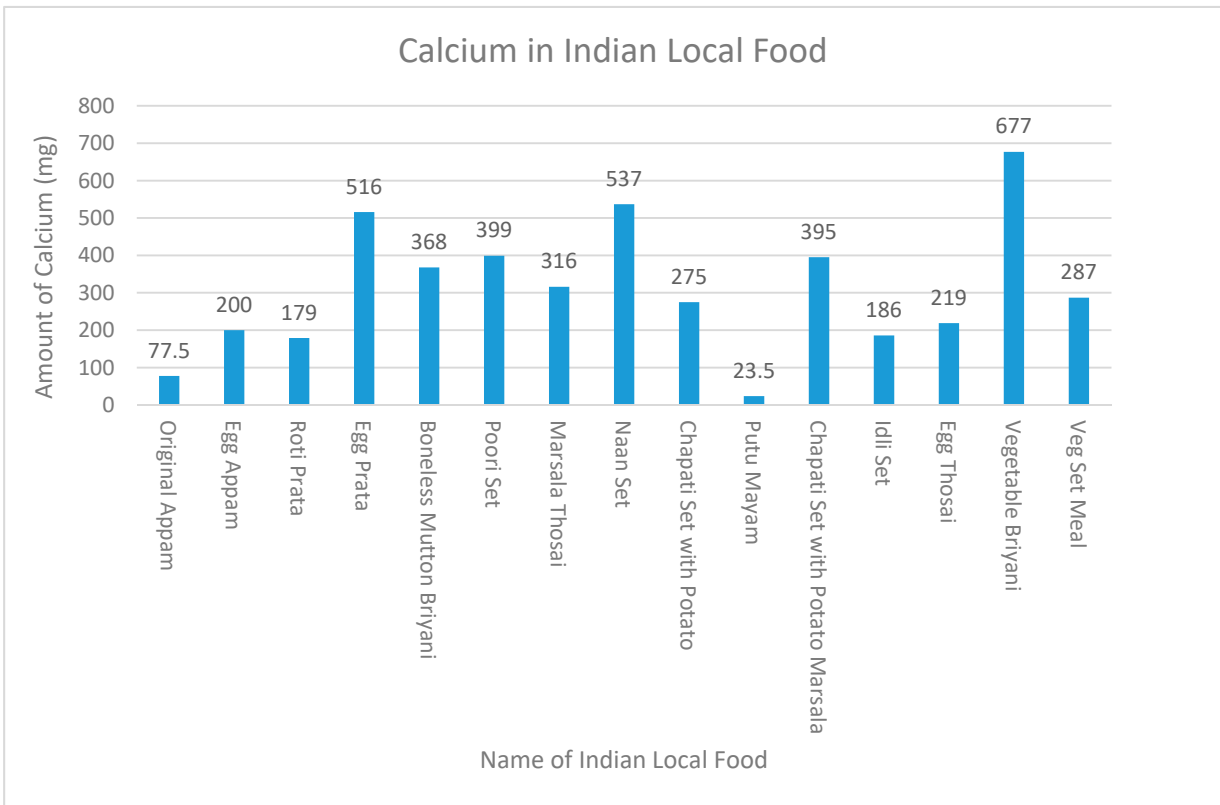

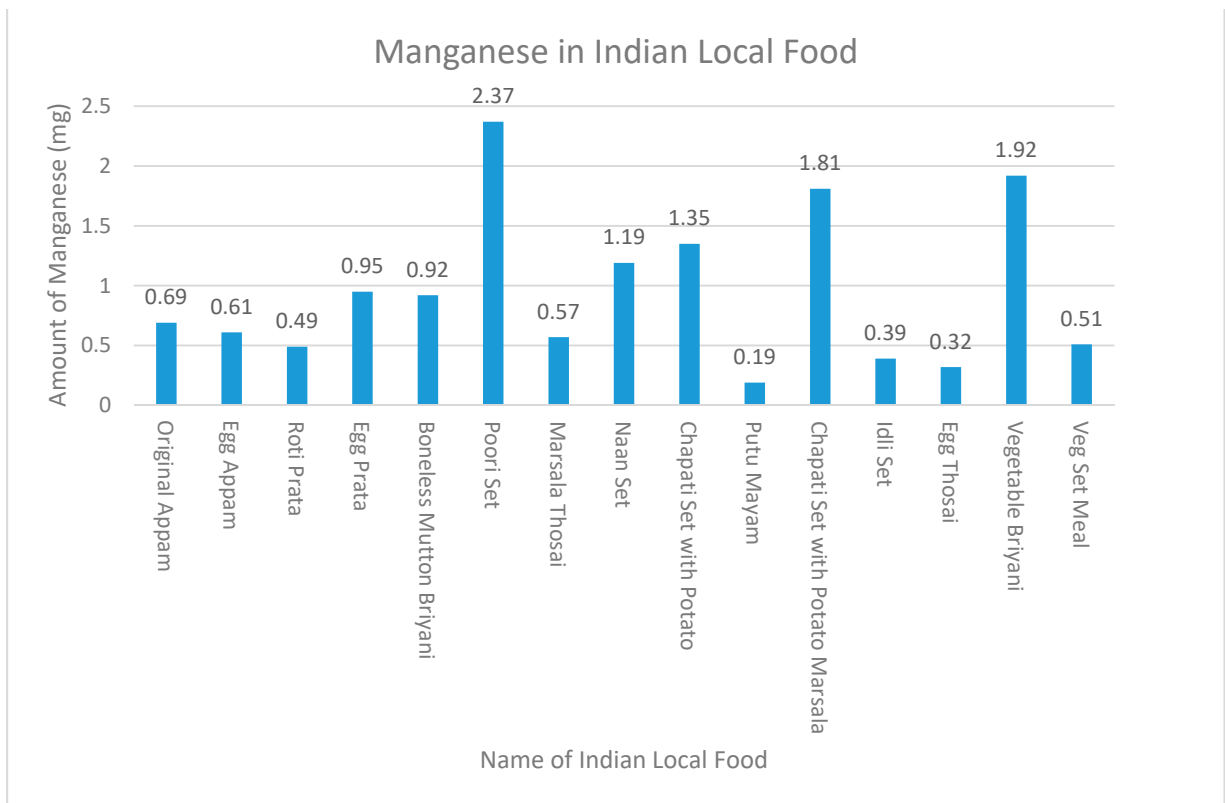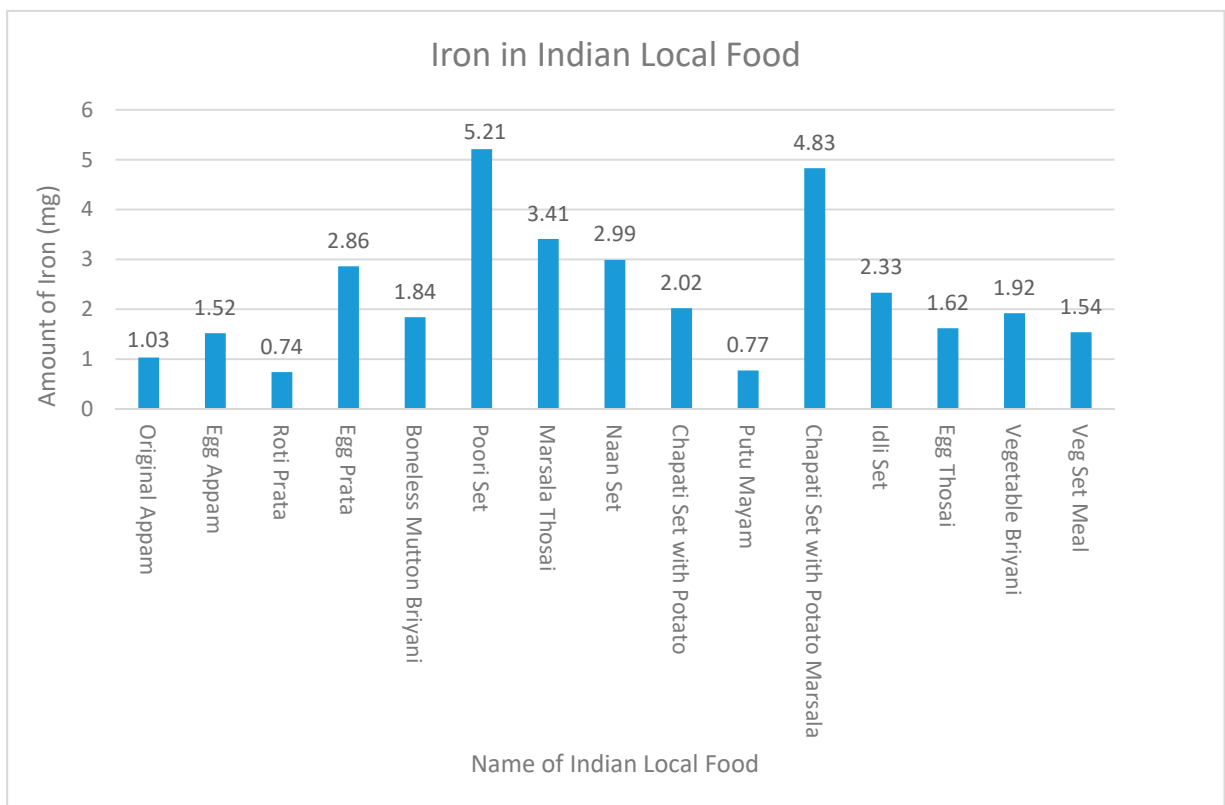

To calculate the mineral content of the food in mg/100g, you can use the value and divide by (portion size/100)

Table S7: Recommended daily allowances of iron, sodium [14]

| Age Group              |                      | Iron (mg) | Sodium (mg) |
|------------------------|----------------------|-----------|-------------|
| en                     | 18- <30 yrs old      | 8         | 2000        |
|                        | 30- <60 yrs          | 8         | 2000        |
|                        | < 60 yrs             | 8         | 2000        |
|                        | <b>Average (Men)</b> | <b>8</b>  | <b>2000</b> |
| Women                  | 18- <30 yrs old      | 18        | 2000        |
|                        | 30- <60 yrs          | 18        | 2000        |
|                        | < 60 yrs             | 8         | 2000        |
|                        | Pregnant             | 27        | 2000        |
|                        | Lactating            | 27        | 2000        |
| <b>Average (Women)</b> |                      | <b>18</b> | <b>2000</b> |

Table S8: Recommended daily allowances of calcium for adults [14].

| Age Group              |                      | Calcium (mg) |
|------------------------|----------------------|--------------|
| Men                    | 19- 50 yrs old       | 800          |
|                        | 51 yrs old and above | 1000         |
|                        | <b>Average (Men)</b> | <b>1000</b>  |
| Women                  | 19-50 yrs old        | 800          |
|                        | 51 yrs old and above | 1000         |
|                        | Pregnant             | 1000         |
|                        | Lactating            | 1000         |
| <b>Average (Women)</b> |                      | <b>1000</b>  |

Table S9: Recommended daily allowances of macronutrients for adults [15]

| Age Group |                        | Energy (kcal) | Protein (g) | Total Fat (g) | Carbohydrates (g) |
|-----------|------------------------|---------------|-------------|---------------|-------------------|
| Men       | 18-29 yrs old          | 2721          | 1.07g/kg    | 90.7          | 408.2             |
|           | 30-39 yrs old          | 2606          |             | 86.9          | 390.9             |
|           | 40-49 yrs old          | 2606          |             | 86.9          | 390.9             |
|           | 50-59 yrs old          | 2606          |             | 86.9          | 390.9             |
|           | 60-69 yrs old          | 2249          |             | 75            | 337.3             |
|           | <b>Average (Men)</b>   | <b>2595</b>   | <b>76.3</b> | <b>86.5</b>   | <b>389.3</b>      |
| Women     | 18-29 yrs old          | 2081          | 1.07g/kg    | 69.4          | 312.1             |
|           | 30-39 yrs old          | 2048          |             | 68.3          | 307.1             |
|           | 40-49 yrs old          | 2048          |             | 68.3          | 307.1             |
|           | 50-59 yrs old          | 2048          |             | 68.3          | 307.1             |
|           | 60-69 yrs old          | 1876          |             | 62.5          | 281.5             |
|           | <b>Average (Women)</b> | <b>2038</b>   | <b>62.6</b> | <b>67.9</b>   | <b>305.7</b>      |
